# Supplementary material for: National hospital readiness for COVID-19 in Lesotho: Evidence for oxygen ecosystem strengthening
Source: bioRxiv or medRxiv preprint supplement (doi:10.1101/2021.04.27.21256199), 2021-04-30
Supplement: Supplementary file [file media-1.pdf]

## **Supplemental Appendix 1: Questions Included in Readiness Questionnaire**

1. Communication and Coordination (7 points maximum)
  - a. Are hospital communications systems available and functional? (0, 0.5, or 1 point)
  - b. Is the hospital able to communicate with District Response Team regarding COVID-19 prevention and response? (0, 0.5, or 1 point)
  - c. Is there a clearly designated person at District Response Team to answer queries? (0, 0.5, or 1 point)
  - d. Is there an official hospital spokesperson for COVID-19 information? (0, 0.5, or 1 point)
  - e. Is there an internal communications plan for COVID-19 that includes staff responsibilities and contact details? (0, 0.5, or 1 point)
  - f. Have hospital staff been briefed on COVID-19 internal communication plans? (0, 0.5, or 1 point)
  - g. Are staff regularly briefed on COVID-19 updates to keep everyone well-informed and manage rumors? (0, 0.5, or 1 point)
2. Human Resources Planning (6 points maximum)
  - a. Has the hospital administration estimated the current human resources capacity to respond to the potential COVID-19 caseload? (0, 0.5, or 1 point)
  - b. Is there a staffing plan to incorporate absenteeism, avoid staff fatigue due to increased workload and ensure continuity of services? (0, 0.5, or 1 point)
  - c. Has the hospital's staff directory been updated for use in managing staffing needs during COVID-19? (0, 0.5, or 1 point)
  - d. Are there strategies to support reassignment (if necessary) of hospital staff with high risk for complications to manage COVID-19 risks? (0, 0.5, or 1 point)
  - e. Is there an occupational health plan to monitor the safety of staff and mitigate COVID-19 risks? (0, 0.5, or 1 point)
  - f. Are mental health and psychosocial support services available for staff? (0, 0.5, or 1 point)
3. Training (6 points maximum)
  - a. Have clinicians (doctors, midwives, nurses) been trained on COVID-19 Clinical Guidelines to ensure competency and safety? (0, 0.5, or 1 point)
  - b. Have other health professionals (pharmacists, social workers, lab technicians) been trained on COVID-19 Clinical Guidelines to ensure competency and safety? (0, 0.5, or 1 point)
  - c. Have non-clinical staff (cleaners, kitchen staff, security guards) been trained on COVID-19 Clinical Guidelines to ensure competency and safety? (0, 0.5, or 1 point)
  - d. Have administrative staff been trained on COVID-19 Clinical Guidelines to ensure adherence to recommendations? (0, 0.5, or 1 point)
  - e. Has District Response Team provided requested support for training? (0, 0.5, or 1 point)

- f. Are COVID-19 Clinical Guidelines available for use by hospital staff? (0, 0.5, or 1 point)
4. Information Management (6 points maximum)
- a. Is there a designated person to ensure the collection and validation of relevant COVID-19 data? (0, 0.5, or 1 point)
  - b. Is district COVID-19 Response Team notified for all suspected or confirmed cases, contacts, and travelers? (0, 0.5, or 1 point)
  - c. Is DHIS2 (tablet) being used to enter weekly reporting? (0, 0.5, or 1 point)
  - d. Are standardized screening tools available? (0, 0.5, or 1 point)
  - e. Are standardized laboratory request forms available? (0, 0.5, or 1 point)
  - f. Are standardized case identification forms available? (0, 0.5, or 1 point)
5. Infection Prevention and Control (7 points maximum)
- a. Does the hospital have IPC guidelines and standard operating procedures? (0, 0.5, or 1 point)
  - b. Does the hospital have a functioning IPC team? (0, 0.5, or 1 point)
  - c. Is there signage regarding hand hygiene, respiratory hygiene, and physical distancing posted within the hospital? (0, 0.5, or 1 point)
  - d. Are there dedicated areas for staff to safely don (put on) PPE? (0, 0.5, or 1 point)
  - e. Are there dedicated areas for staff to safely doff (take off) PPE? (0, 0.5, or 1 point)
  - f. Are beds in isolation wards placed at least 1 meter apart? (0, 0.5, or 1 point)
  - g. Are beds in general wards placed at least 1 meter apart? (0, 0.5, or 1 point)
6. IPC Supply Chain Management (9 points maximum)
- a. Are cleaning and disinfecting supplies available? (0, 0.5, or 1 point)
  - b. Are dedicated cleaning and disinfecting supplies available for isolation areas? (0, 0.5, or 1 point)
  - c. Are hand hygiene products (water, soap, hand sanitizer) available for staff? (0, 0.5, or 1 point)
  - d. Are hand hygiene products (water, soap, hand sanitizer) available for patients and visitors? (0, 0.5, or 1 point)
  - e. Are scrubs available for staff working with COVID-19 cases? (0, 0.5, or 1 point)
  - f. Are gowns, gloves, face shields/goggles available for staff requiring contact/droplet precautions? (0, 0.5, or 1 point)
  - g. Are surgical masks available for all staff providing clinical care? (0, 0.5, or 1 point)
  - h. Are surgical masks available for patients and visitors with respiratory symptoms and/or high-risk COVID-19 exposure? (0, 0.5, or 1 point)
  - i. Are N95 masks available for staff performing aerosolizing procedures? (0, 0.5, or 1 point)
7. Screening (5 points maximum)
- a. Are all persons entering hospital grounds (including staff) being screened for COVID-19? (0, 0.5, or 1 point)

- b. Is a standardized screening tool being used at all points of entry to the hospital? (0, 0.5, or 1 point)
  - c. Are all persons performing hand hygiene after screening? (0, 0.5, or 1 point)
  - d. Are surgical masks being provided for all person with a positive screen? (symptomatic persons, contacts, travelers) (0, 0.5, or 1 point)
  - e. Have screeners (lay workers and professionals) been trained on screening protocols and case definitions for COVID-19? (suspect case, probable case, confirmed case, contact) (0, 0.5, or 1 point)
8. Triage (7 points maximum)
- a. Is there an area designated for additional screening and triage of those with exposure to COVID-19 or symptoms of COVID-19? (0, 0.5, or 1 point)
  - b. Are there separate areas within the triage and isolation area for symptomatic and asymptomatic persons? (0, 0.5, or 1 point)
  - c. Is pulse oximetry available in triage to check the oxygen saturation of those with exposure to or symptoms of COVID-19? (0, 0.5, or 1 point)
  - d. Are infrared (non-touch) thermometers available for temperature assessment? (0, 0.5, or 1 point)
  - e. Are complete vital signs (heart rate, respiratory rate, blood pressure, temperature, oxygen saturation) taken for all persons with exposure to or symptoms of COVID-19? (0, 0.5, or 1 point)
  - f. Are those with mild or moderate disease presentation being screened for risk factors for severe disease? (0, 0.5, or 1 point)
  - g. Is mental health screening (psychological first aid) provided to all COVID-19 suspect and confirmed cases? (0, 0.5, or 1 point)
9. Diagnostic Testing (7 points maximum)
- a. Are samples for testing being collected on-site? (0, 0.5, or 1 point)
  - b. Have all staff collecting samples been trained on specimen collection procedures? (0, 0.5, or 1 point)
  - c. Are testing supplies (such as swabs) available? (0, 0.5, or 1 point)
  - d. Are you receiving results directly? (0, 0.5, or 1 point)
  - e. Are you receiving results within 72 hours? (0, 0.5, or 1 point)
  - f. Are specimens transported to National Reference Laboratory within 72 hours? (0, 0.5, or 1 point)
  - g. Are diagnostic tests performed for other diagnoses (such as GXP for TB)? (0, 0.5, or 1 point)
10. Isolation Wards (5 points maximum)
- a. Is a log kept of all individuals entering the room of a patient with suspected or confirmed COVID-19? (0, 0.5, or 1 point)
  - b. Are designated isolation areas available for asymptomatic contacts or travelers who cannot safely quarantine at home? (0, 0.5, or 1 point)
  - c. Are designated isolation areas available for suspect cases with mild/moderate disease who cannot safely isolate at home? (0, 0.5, or 1 point)
  - d. Are isolated patients being monitored twice daily for signs of deterioration? (0, 0.5, or 1 point)

- e. Is pulse oximetry available in isolation areas to monitor for deterioration? (0, 0.5, or 1 point)

11. Severe Disease Management (7 points maximum)

- a. Are designated isolation areas available for suspected or confirmed cases with severe disease awaiting transport to Treatment Centre? (0, 0.5, or 1 point)
- b. Is supplemental oxygen available for patients with severe disease awaiting transport to Treatment Centre? (0, 0.5, or 1 point)
- c. Are nasal cannulas and face masks available for patients need supplemental oxygen? (0, 0.5, or 1 point)
- d. Is dexamethasone available for patients with severe disease? (0, 0.5, or 1 point)
- e. Are broad-spectrum antibiotics available for patients with severe disease? (ceftriaxone, azithromycin, clarithromycin, amoxicillin-clavulanate, doxycycline) (0, 0.5, or 1 point)
- f. Is radiology (CXR) available for patients with severe disease? (0, 0.5, or 1 point)
- g. Is rapid glucometer available to monitor blood sugar? (0, 0.5, or 1 point)

12. Transport (3 points maximum)

- a. Is the ambulance available on time? (0, 0.5, or 1 point)
- b. Is District Health Management Team able to follow-up alerts? (0, 0.5, or 1 point)
- c. Is transportation available for contact tracing and other community outreaches? (travelers, suspect cases, etc.) (0, 0.5, or 1 point)

Supplemental Appendix 2: Lesotho Oxygen Ecosystem at Baseline in July 2020

|                                     |                    | Pulse oximetry: Triage (yes/no) | Pulse oximetry: Inpatient (yes/no) | Oxygen (yes/no) | Oxygen cylinders with regulators, N | Oxygen concentrators, N | Oxygen delivery capacity, N | Heated high flow nasal cannula (yes/no) | Non-invasive partial pressure ventilation (yes/no) | Invasive mechanical ventilation (yes/no) |
|-------------------------------------|--------------------|---------------------------------|------------------------------------|-----------------|-------------------------------------|-------------------------|-----------------------------|-----------------------------------------|----------------------------------------------------|------------------------------------------|
| District Hospitals                  | Scott              | Yes                             | No                                 | Yes             | 0                                   | 1                       | 1                           | No                                      | No                                                 | No                                       |
|                                     | St Joseph          | No                              | Yes                                | Yes             | 0                                   | 4                       | 4                           | No                                      | No                                                 | No                                       |
|                                     | Ntsekhe            | No                              | No                                 | No              | 0                                   | 0                       | 0                           | No                                      | No                                                 | No                                       |
|                                     | Quthing            | Yes                             | Yes                                | No              | 0                                   | 0                       | 0                           | No                                      | No                                                 | No                                       |
|                                     | Machabeng          | No                              | No                                 | No              | 0                                   | 0                       | 0                           | No                                      | No                                                 | No                                       |
|                                     | Tebellong          | Yes                             | No                                 | Yes             | 1                                   | 1                       | 2                           | No                                      | No                                                 | No                                       |
|                                     | Paray              | No                              | No                                 | Yes             | 3                                   | 2                       | 5                           | No                                      | No                                                 | No                                       |
|                                     | St James           | No                              | No                                 | Yes             | 3                                   | 0                       | 3                           | No                                      | No                                                 | No                                       |
|                                     | Maluti             | Yes                             | Yes                                | Yes             | 0                                   | 3                       | 3                           | No                                      | No                                                 | No                                       |
|                                     | Motebang           | Yes                             | Yes                                | Yes             | 1                                   | 0                       | 1                           | No                                      | No                                                 | No                                       |
|                                     | Mamohau            | Yes                             | Yes                                | Yes             | 1                                   | 0                       | 1                           | No                                      | No                                                 | No                                       |
|                                     | Botha Bothe        | Yes                             | Yes                                | Yes             | 0                                   | 2                       | 2                           | No                                      | No                                                 | No                                       |
|                                     | Seboche            | Yes                             | Yes                                | Yes             | 0                                   | 3                       | 3                           | No                                      | No                                                 | No                                       |
|                                     | Mokhotlong         | No                              | No                                 | Yes             | 0                                   | 2                       | 2                           | No                                      | No                                                 | No                                       |
|                                     | Sub-Total, % (n/N) | 57.1% (8/14)                    | 50.0% (7/14)                       | 78.5% (11/14)   | 10                                  | 18                      | 28                          | 0% (0/14)                               | 0% (0/14)                                          | 0% (0/14)                                |
| COVID-19 Treatment Centre Hospitals | Berea              | Yes                             | Yes                                | Yes             | 6                                   | 8                       | 14                          | No                                      | Yes (1)                                            | No                                       |
|                                     | Mafeteng           | Yes                             | Yes                                | Yes             | 6                                   | 2                       | 8                           | No                                      | No                                                 | No                                       |
|                                     |                    | Sub-Total, % (n/N)              | 100% (2/2)                         | 100% (2/2)      | 100% (2/2)                          | 12                      | 10                          | 22                                      | 0% (0/2)                                           | 50.0% (1/2)                              |
| <b>Total</b>                        |                    | 62.5% (10/16)                   | 56.3% (9/16)                       | 81.3% (13/16)   | 22                                  | 28                      | 50                          | 0% (0/16)                               | 6.2% (1/16)                                        | 0% (0/16)                                |

Supplemental Appendix 3: Lesotho Oxygen Ecosystem at Follow-up in December 2020

|                            |                    | Pulse oximetry: Triage (yes/no) | Pulse oximetry: Inpatient (yes/no) | Oxygen (yes/no) | Oxygen cylinders with regulators, N | Oxygen concentrators, N | Oxygen delivery capacity, N | Heated high flow nasal cannula (yes/no) | Non-invasive partial pressure ventilation (yes/no) | Invasive mechanical ventilation (yes/no) |
|----------------------------|--------------------|---------------------------------|------------------------------------|-----------------|-------------------------------------|-------------------------|-----------------------------|-----------------------------------------|----------------------------------------------------|------------------------------------------|
| District-based Hospitals   | Scott              | Yes                             | Yes                                | Yes             | 1                                   | 3                       | 4                           | Yes                                     | Yes                                                | No                                       |
|                            | St Joseph          | Yes                             | Yes                                | Yes             | 2                                   | 4                       | 6                           | No                                      | No                                                 | No                                       |
|                            | Ntsekhe            | Yes                             | Yes                                | Yes             | 2                                   | 6                       | 8                           | Yes                                     | No                                                 | No                                       |
|                            | Quthing            | Yes                             | Yes                                | Yes             | 0                                   | 4                       | 4                           | Yes                                     | No                                                 | No                                       |
|                            | Machabeng          | Yes                             | Yes                                | Yes             | 1                                   | 6                       | 7                           | Yes                                     | No                                                 | No                                       |
|                            | Tebellong          | Yes                             | No                                 | Yes             | 1                                   | 2                       | 3                           | No                                      | No                                                 | No                                       |
|                            | Paray              | Yes                             | Yes                                | Yes             | 3                                   | 10                      | 13                          | No                                      | Yes                                                | No                                       |
|                            | St James           | Yes                             | Yes                                | Yes             | 3                                   | 3                       | 6                           | No                                      | No                                                 | No                                       |
|                            | Maluti             | Yes                             | Yes                                | Yes             | 5                                   | 3                       | 8                           | Yes                                     | Yes                                                | No                                       |
|                            | Motebang           | Yes                             | Yes                                | Yes             | 1                                   | 7                       | 8                           | Yes                                     | No                                                 | No                                       |
|                            | Mamohau            | Yes                             | Yes                                | Yes             | 1                                   | 2                       | 3                           | No                                      | No                                                 | No                                       |
|                            | Botha Bothe        | Yes                             | Yes                                | Yes             | 0                                   | 6                       | 6                           | Yes                                     | No                                                 | No                                       |
|                            | Seboche            | Yes                             | Yes                                | Yes             | 0                                   | 6                       | 6                           | Yes                                     | No                                                 | No                                       |
|                            | Mokhotlong         | Yes                             | Yes                                | Yes             | 0                                   | 6                       | 6                           | Yes                                     | No                                                 | No                                       |
|                            | Sub-Total, % (n/N) | 100% (14/14)                    | 92.9% (13/14)                      | 100% (14/14)    | 20                                  | 68                      | 88                          | 64.3% (9/14)                            | 21.4% (3/14)                                       | 0% (0/14)                                |
| COVID-19 Treatment Centers | Berea              | Yes                             | Yes                                | Yes             | 9                                   | 21                      | 30                          | Yes                                     | Yes                                                | No                                       |
|                            | Mafeteng           | Yes                             | Yes                                | Yes             | 10                                  | 21                      | 31                          | Yes                                     | Yes                                                | No                                       |
|                            |                    | Sub-Total, % (n/N)              | 100% (2/2)                         | 100% (2/2)      | 100% (2/2)                          | 19                      | 42                          | 61                                      | 100% (2/2)                                         | 100% (2/2)                               |
| <b>Total</b>               |                    | 100% (16/16)                    | 93.8% (15/16)                      | 100% (16/16)    | 39                                  | 110                     | 149                         | 68.8% (11/16)                           | 31.2% (5/16)                                       | 0% (0/16)                                |
